# Supplementary material for: Examining the Evolution of the Regulatory Circuit Controlling Secondary Metabolism and Development in the Fungal Genus Aspergillus
Source: PubMed Central journal article supplement (PMC4364702; doi:10.1371/journal.pgen.1005096), 2015-03-18

# Regulation of an SM cluster and its orthologs

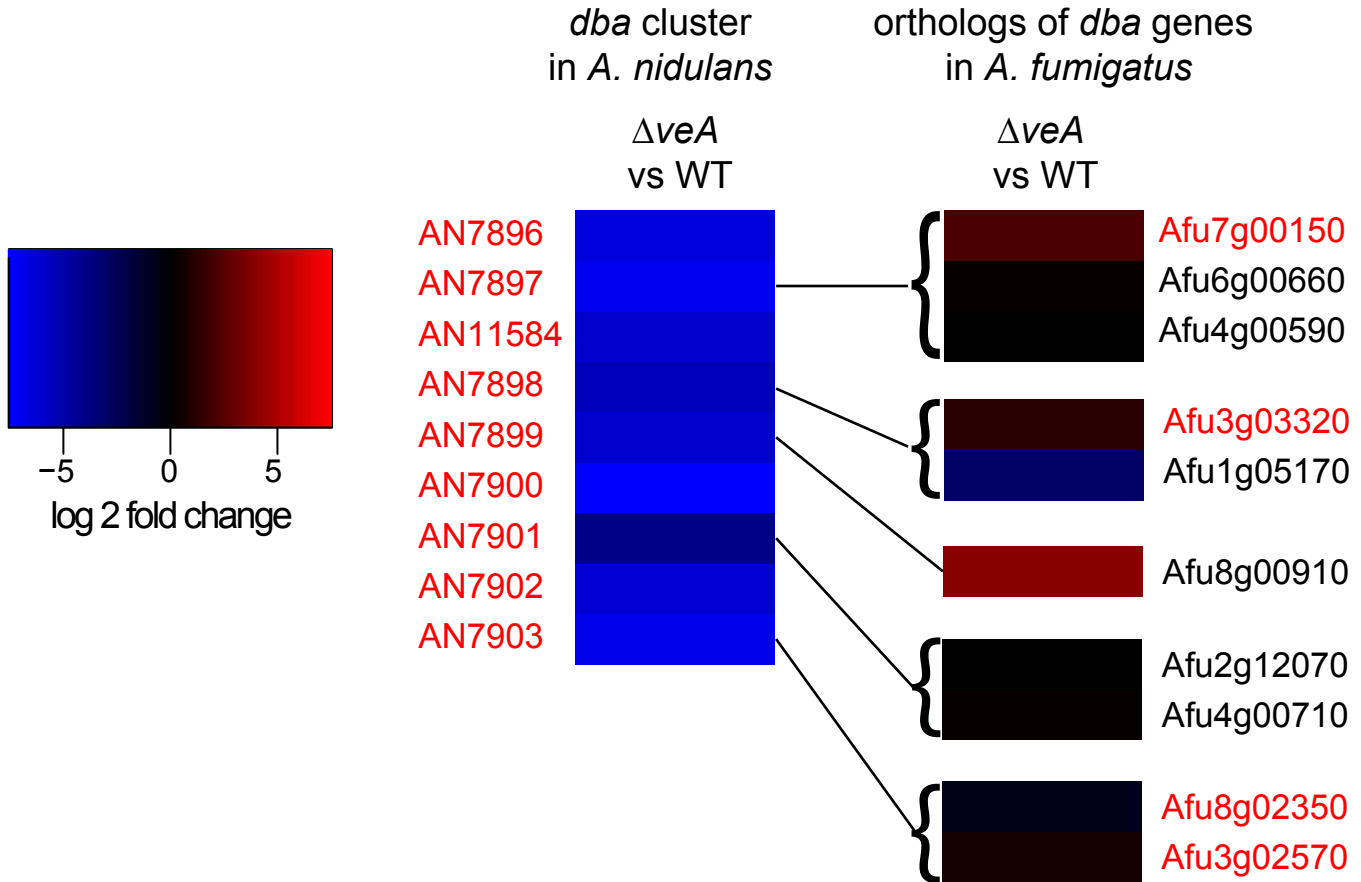

Supplement: pgen.1005096.s002.pdf [file pgen.1005096.s002.pdf]
